# Supplementary material for: Transferability of Human and Environmental Microbiome on Clothes as a Tool for Forensic Investigations
Source: MDPI journal article supplement (doi:10.3390/genes15030375), 2024-03-19
Supplement: s1 [file s1]

# Transferability of human and environmental microbiome on clothes as a tool for forensic investigation

## Supplementary Materials

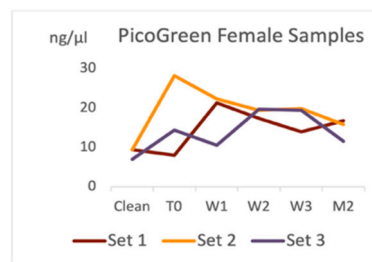

Supplementary Figure S1. A visual representation of the calculated concentrations from the Quant-iT™ PicoGreen™ measurements of the female samples collected after washing the t-shirt (“clean”) and after wearing it at time 0, after 1,2 and 3 weeks, and after 2 months. Each of the three sets of replicates is reported with three different colours.

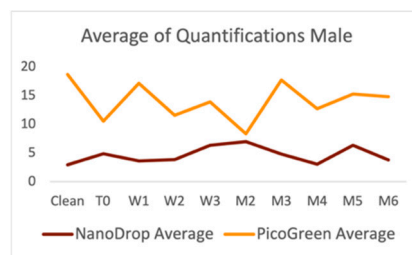

Supplementary Figure S2. Average concentrations of the male samples over time (T0-month 6), divided by quantification methods (NanoDrop™ vs Quant-iT™ PicoGreen™).

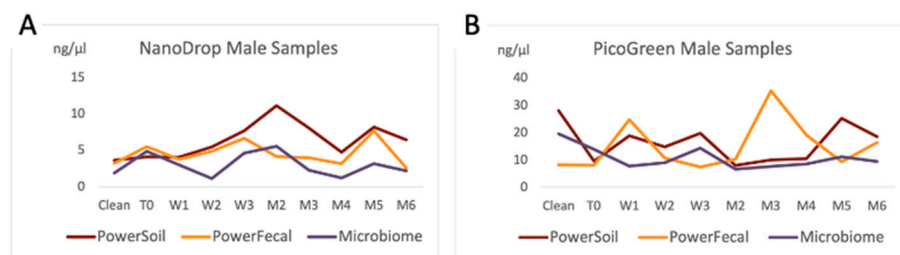

Supplementary Figure S3. Concentrations of the male samples over time (T0-month 6) measured with (a) NanoDrop™ and (B) Quant-iT™ PicoGreen™.

|                                       | Kingdom     | Phylum           | Class                | Order               | Family             | Genus                             | Species                                   | unique                                   |
|---------------------------------------|-------------|------------------|----------------------|---------------------|--------------------|-----------------------------------|-------------------------------------------|------------------------------------------|
| CORE MICROBIOME MALE SWABS            |             |                  |                      |                     |                    |                                   |                                           |                                          |
| ASV1066                               | d__Bacteria | Firmicutes       | Bacilli              | Lactobacillales     | Streptococcaceae   | Streptococcus                     | Streptococcus Genus                       | 06f825b512d9<br>03b9230e1a5<br>5d87359ee |
| ASV1088                               | d__Bacteria | Firmicutes       | Bacilli              | Staphylococcales    | Staphylococcaceae  | Staphylococcus                    | Staphylococcus Genus                      | 65d43491988<br>bfe557da4d86<br>a5ba25dae |
| ASV1336                               | d__Bacteria | Actinobacteriota | Actinobacteria       | Corynebacteriales   | Corynebacteriaceae | Corynebacterium                   | Corynebacterium Genus                     | aa9b3a1418d<br>146c262ec633<br>05292065a |
| ASV1341                               | d__Bacteria | Actinobacteriota | Actinobacteria       | Corynebacteriales   | Corynebacteriaceae | Corynebacterium                   | Corynebacterium _aurimucosum              | 6a4c0e5943a<br>7eb8cf0b5b5<br>e69171828  |
| CORE MICROBIOME T-SHIRTS POST WASHING |             |                  |                      |                     |                    |                                   |                                           |                                          |
| ASV1088                               | d__Bacteria | Firmicutes       | Bacilli              | Staphylococcales    | Staphylococcaceae  | Staphylococcus                    | Staphylococcus Genus                      | 65d43491988<br>bfe557da4d86<br>a5ba25dae |
| ASV1336                               | d__Bacteria | Actinobacteriota | Actinobacteria       | Corynebacteriales   | Corynebacteriaceae | Corynebacterium                   | Corynebacterium Genus                     | aa9b3a1418d<br>146c262ec633<br>05292065a |
| ASV1341                               | d__Bacteria | Actinobacteriota | Actinobacteria       | Corynebacteriales   | Corynebacteriaceae | Corynebacterium                   | Corynebacterium _aurimucosum              | 6a4c0e5943a<br>7eb8cf0b5b5<br>e69171828  |
| ASV1623                               | d__Bacteria | Proteobacteria   | Gammaproteo bacteria | Pseudomonadales     | Moraxellaceae      | Acinetobacter                     | Acinetobacter Genus                       | ea03646ed2<br>2d679fa45862<br>63d8fc32f  |
| CORE MICROBIOME BOXES                 |             |                  |                      |                     |                    |                                   |                                           |                                          |
| ASV95                                 | d__Bacteria | Proteobacteria   | Alphaproteobacteria  | Rhizobiales         | Beijerinckiaceae   | Methylobacterium-Methylobacterium | Methylobacterium_m_soli                   | 310c4295d08<br>0f79e09b15ee<br>634bf65cf |
| ASV103                                | d__Bacteria | Proteobacteria   | Alphaproteobacteria  | Rhizobiales         | Beijerinckiaceae   | Methylobacterium-Methylobacterium | Methylobacterium_m-Methylobacterium Genus | e0f50c5adf53<br>7a0a3a63e61<br>720b38ed5 |
| ASV1017                               | d__Bacteria | Firmicutes       | Bacilli              | Paenibacillales     | Paenibacillaceae   | Paenibacillus                     | Paenibacillus Genus                       | ba6c32d2cb6<br>92cd9e0fdc36<br>93a3996e5 |
| ASV1019                               | d__Bacteria | Firmicutes       | Bacilli              | Paenibacillales     | Paenibacillaceae   | Paenibacillus                     | Paenibacillus_ti monensis                 | 2c16378eb83f<br>b581fa19dc78<br>50ef14e4 |
| ASV1022                               | d__Bacteria | Firmicutes       | Bacilli              | Paenibacillales     | Paenibacillaceae   | Paenibacillus                     | Paenibacillus Genus                       | d3fc258e178<br>740b8efd9946<br>f7f08cd3  |
| ASV1028                               | d__Bacteria | Firmicutes       | Bacilli              | Bacillales          | Bacillaceae        | Bacillus                          | Bacillus Genus                            | b8c545c99dea<br>06d010eb0bf<br>2c6572d1c |
| ASV1033                               | d__Bacteria | Firmicutes       | Bacilli              | Bacillales          | Planococcaceae     | Lysinibacillus                    | Lysinibacillus Genus                      | 1fb6ab5be1d4<br>27ef2ed5faea<br>acd60eca |
| ASV1219                               | d__Bacteria | Actinobacteriota | Actinobacteria       | Propionibacteriales | Nocardioidaceae    | Nocardioides                      | Nocardioides Genus                        | 7eb6d17edc7<br>00607f19d055<br>c57c86222 |
| CORE MICROBIOME TRANSFER AT T14 DAYS  |             |                  |                      |                     |                    |                                   |                                           |                                          |
| ASV1066                               | d__Bacteria | Firmicutes       | Bacilli              | Lactobacillales     | Streptococcaceae   | Streptococcus                     | Streptococcus Genus                       | 06f825b512d9<br>03b9230e1a5<br>5d87359ee |
| ASV1678                               | d__Bacteria | Proteobacteria   | Gammaproteo bacteria | Burkholderiales     | Neisseriaceae      | Neisseria                         | Neisseria Genus                           | f1860fe71625<br>7bd5fd5c4c6a<br>16cf3b95 |
| CORE MICROBIOME TRANSFER AT T21 DAYS  |             |                  |                      |                     |                    |                                   |                                           |                                          |
| ASV1266                               | d__Bacteria | Actinobacteriota | Actinobacteria       | Micrococcales       | Micrococcaceae     | Micrococcus                       | Micrococcus Genus                         | 0c579d21280<br>801f02a641e1<br>608606927 |
| CORE MICROBIOME TRANSFER AT T60 DAYS  |             |                  |                      |                     |                    |                                   |                                           |                                          |
| ASV1066                               | d__Bacteria | Firmicutes       | Bacilli              | Lactobacillales     | Streptococcaceae   | Streptococcus                     | Streptococcus Genus                       | 06f825b512d9<br>03b9230e1a5<br>5d87359ee |
| ASV1266                               | d__Bacteria | Actinobacteriota | Actinobacteria       | Micrococcales       | Micrococcaceae     | Micrococcus                       | Micrococcus Genus                         | 0c579d21280<br>801f02a641e1<br>608606927 |
| CORE MICROBIOME TRANSFER AT T90 DAYS  |             |                  |                      |                     |                    |                                   |                                           |                                          |
| ASV1066                               | d__Bacteria | Firmicutes       | Bacilli              | Lactobacillales     | Streptococcaceae   | Streptococcus                     | Streptococcus Genus                       | 06f825b512d9<br>03b9230e1a5<br>5d87359ee |
| ASV1266                               | d__Bacteria | Actinobacteriota | Actinobacteria       | Micrococcales       | Micrococcaceae     | Micrococcus                       | Micrococcus Genus                         | 0c579d21280<br>801f02a641e1<br>608606927 |
| CORE MICROBIOME TRANSFER AT T120 DAYS |             |                  |                      |                     |                    |                                   |                                           |                                          |

|                                       |             |                  |                |                 |                  |               |                     |                                  |
|---------------------------------------|-------------|------------------|----------------|-----------------|------------------|---------------|---------------------|----------------------------------|
| ASV1266                               | d__Bacteria | Actinobacteriota | Actinobacteria | Micrococcales   | Micrococcaceae   | Micrococcus   | Micrococcus Genus   | 0c579d21280801f02a641e1608606927 |
| CORE MICROBIOME TRANSFER AT T150 DAYS |             |                  |                |                 |                  |               |                     |                                  |
| ASV1066                               | d__Bacteria | Firmicutes       | Bacilli        | Lactobacillales | Streptococcaceae | Streptococcus | Streptococcus Genus | 06f825b512d903b9230e1a55d87359ee |
| ASV1266                               | d__Bacteria | Actinobacteriota | Actinobacteria | Micrococcales   | Micrococcaceae   | Micrococcus   | Micrococcus Genus   | 0c579d21280801f02a641e1608606927 |
| CORE MICROBIOME TRANSFER AT T180 DAYS |             |                  |                |                 |                  |               |                     |                                  |
| ASV1066                               | d__Bacteria | Firmicutes       | Bacilli        | Lactobacillales | Streptococcaceae | Streptococcus | Streptococcus Genus | 06f825b512d903b9230e1a55d87359ee |
| ASV1266                               | d__Bacteria | Actinobacteriota | Actinobacteria | Micrococcales   | Micrococcaceae   | Micrococcus   | Micrococcus Genus   | 0c579d21280801f02a641e1608606927 |
